# Supplementary material
Source: PubMed Central journal article supplement (PMC5018248)

**Table S1. Demographic, postmortem, and clinical characteristics of human subjects used in this study.**

| Unaffected Comparison Subjects |       |              |     |                  |                              |     |     |                             | Subjects with Schizophrenia |                                                  |              |     |                  |                              |     |     |                                     |                 |                        |                             |                                        |
|--------------------------------|-------|--------------|-----|------------------|------------------------------|-----|-----|-----------------------------|-----------------------------|--------------------------------------------------|--------------|-----|------------------|------------------------------|-----|-----|-------------------------------------|-----------------|------------------------|-----------------------------|----------------------------------------|
| Pair                           | Case  | Sex/<br>Race | Age | PMI <sup>a</sup> | Storage<br>Time <sup>b</sup> | RIN | pH  | Cause of Death              | Case                        | DSM IV diagnosis                                 | Sex/<br>Race | Age | PMI <sup>a</sup> | Storage<br>Time <sup>b</sup> | RIN | pH  | Cause of Death                      | Tobacco<br>ATOD | Anti-psychotic<br>ATOD | Anti-<br>depressant<br>ATOD | Benzodiazepine/<br>Anticonvulsant ATOD |
| 1                              | 592   | M/B          | 41  | 22.1             | 213                          | 9.0 | 6.7 | ASCVD                       | 533                         | Chronic undifferentiated schizophrenia           | M/W          | 40  | 29.1             | 222                          | 8.4 | 6.8 | Accidental Asphyxiation             | Unknown         | Yes                    | No                          | No                                     |
| 2                              | 567   | F/W          | 46  | 15.0             | 217                          | 8.9 | 6.7 | Mitral valve prolapse       | 537                         | Schizoaffective disorder                         | F/W          | 37  | 14.5             | 222                          | 8.6 | 6.7 | Suicide by hanging                  | Unknown         | No                     | No                          | No                                     |
| 3                              | 516   | M/B          | 20  | 14.0             | 224                          | 8.4 | 6.9 | Homicide by gun shot        | 547                         | Schizoaffective disorder                         | M/B          | 27  | 16.5             | 220                          | 7.4 | 7.0 | Heat Stroke                         | Unknown         | Yes                    | Yes                         | Yes                                    |
| 4                              | 630   | M/W          | 65  | 21.2             | 210                          | 9.0 | 7.0 | ASCVD                       | 566                         | Chronic undifferentiated schizophrenia; AAR      | M/W          | 63  | 18.3             | 221                          | 8.0 | 6.8 | ASCVD                               | Yes             | Yes                    | Yes                         | Yes                                    |
| 5                              | 604   | M/W          | 39  | 19.3             | 214                          | 8.6 | 7.1 | Hypoplastic coronary artery | 581                         | Chronic paranoid schizophrenia; ADC; OAC         | M/W          | 46  | 28.1             | 218                          | 7.9 | 7.2 | Accidental combined drug overdose   | Unknown         | Yes                    | No                          | Yes                                    |
| 6                              | 546   | F/W          | 37  | 23.5             | 221                          | 8.6 | 6.7 | ASCVD                       | 587                         | Chronic undifferentiated schizophrenia; AAR      | F/B          | 38  | 17.8             | 213                          | 9.0 | 7.0 | Myocardial hypertrophy              | Yes             | Yes                    | No                          | Yes                                    |
| 7                              | 551   | M/W          | 61  | 16.4             | 219                          | 8.3 | 6.6 | Cardiac tamponade           | 625                         | Chronic disorganized schizophrenia; AAC          | M/B          | 49  | 23.5             | 207                          | 7.6 | 7.3 | ASCVD                               | Yes             | Yes                    | Yes                         | No                                     |
| 8                              | 685   | M/W          | 56  | 14.5             | 200                          | 8.1 | 6.6 | Hypoplastic coronary artery | 622                         | Chronic undifferentiated schizophrenia           | M/W          | 58  | 18.9             | 207                          | 7.4 | 6.8 | Right MCA infarction                | Unknown         | No                     | No                          | No                                     |
| 9                              | 681   | M/W          | 51  | 11.6             | 200                          | 8.9 | 7.2 | Hypertrophic cardiomyopathy | 640                         | Chronic paranoid schizophrenia                   | M/W          | 49  | 5.2              | 205                          | 8.4 | 6.9 | Pulmonary embolism                  | Unknown         | Yes                    | Yes                         | No                                     |
| 10                             | 806   | M/W          | 57  | 24.0             | 179                          | 7.8 | 6.9 | Pulmonary embolism          | 665                         | Chronic paranoid schizophrenia; ADC              | M/B          | 59  | 28.1             | 203                          | 9.2 | 6.9 | Intestinal hemorrhage               | Yes             | Yes                    | Yes                         | No                                     |
| 11                             | 822   | M/B          | 28  | 25.3             | 176                          | 8.5 | 7.0 | ASCVD                       | 787                         | Schizoaffective disorder; ODC                    | M/B          | 27  | 19.2             | 182                          | 8.4 | 6.7 | Suicide by gun shot                 | No              | Yes                    | No                          | No                                     |
| 12                             | 727   | M/B          | 19  | 7.0              | 193                          | 9.2 | 7.2 | Trauma                      | 829                         | Schizoaffective disorder; ADC; OAR               | M/W          | 25  | 5.0              | 174                          | 9.3 | 6.8 | Suicide by salicylate overdose      | Yes             | No                     | No                          | Yes                                    |
| 13                             | 871   | M/W          | 28  | 16.5             | 166                          | 8.5 | 7.1 | Trauma                      | 878                         | Disorganized schizophrenia; ADC                  | M/W          | 33  | 10.8             | 165                          | 8.9 | 6.7 | Myocardial fibrosis                 | Yes             | Yes                    | Yes                         | Yes                                    |
| 14                             | 575   | F/B          | 55  | 11.3             | 215                          | 9.6 | 6.8 | ASCVD                       | 517                         | Disorganized schizophrenia; ADC                  | F/W          | 48  | 3.7              | 224                          | 9.3 | 6.7 | Intracerebral hemorrhage            | Yes             | Yes                    | No                          | No                                     |
| 15                             | 700   | M/W          | 42  | 26.1             | 198                          | 8.7 | 7.0 | ASCVD                       | 539                         | Schizoaffective disorder; ADR                    | M/W          | 50  | 40.5             | 222                          | 8.1 | 7.1 | Suicide by combined drug overdose   | Unknown         | Yes                    | Yes                         | Yes                                    |
| 16                             | 988   | M/W          | 82  | 22.5             | 144                          | 8.4 | 6.2 | Trauma                      | 621                         | Chronic undifferentiated schizophrenia           | M/W          | 83  | 16.0             | 208                          | 8.7 | 7.3 | Accidental asphyxiation             | Unknown         | No                     | No                          | No                                     |
| 17                             | 686   | F/W          | 52  | 22.6             | 199                          | 8.5 | 7.0 | ASCVD                       | 656                         | Schizoaffective disorder; ADC                    | F/B          | 47  | 20.1             | 204                          | 9.2 | 7.3 | Suicide by gun shot                 | Yes             | Yes                    | No                          | No                                     |
| 18                             | 634   | M/W          | 52  | 16.2             | 207                          | 8.5 | 7.0 | ASCVD                       | 722                         | Chronic undifferentiated schizophrenia; ODR; OAR | M/B          | 45  | 9.1              | 194                          | 9.2 | 6.7 | Upper GI bleeding                   | Yes             | Yes                    | No                          | No                                     |
| 19                             | 852   | M/W          | 54  | 8.0              | 169                          | 9.1 | 6.8 | Cardiac tamponade           | 781                         | Schizoaffective disorder; ADR                    | M/B          | 52  | 8.0              | 184                          | 7.7 | 6.7 | Peritonitis                         | Yes             | Yes                    | Yes                         | No                                     |
| 20                             | 987   | F/W          | 65  | 21.5             | 144                          | 9.1 | 6.8 | ASCVD                       | 802                         | Schizoaffective disorder; ADC; ODR               | F/W          | 63  | 29.0             | 180                          | 9.2 | 6.4 | Right ventricular dysplasia         | Yes             | Yes                    | No                          | Yes                                    |
| 21                             | 818   | F/W          | 67  | 24.0             | 177                          | 8.4 | 7.1 | Anaphylactic reaction       | 917                         | Chronic undifferentiated schizophrenia           | F/W          | 71  | 23.8             | 157                          | 7.0 | 6.8 | ASCVD                               | Yes             | Yes                    | No                          | No                                     |
| 22                             | 857   | M/W          | 48  | 16.6             | 167                          | 8.9 | 6.7 | ASCVD                       | 930                         | Disorganized schizophrenia; ADR; OAR             | M/W          | 47  | 15.3             | 154                          | 8.2 | 6.2 | ASCVD                               | Yes             | Yes                    | No                          | Yes                                    |
| 23                             | 739   | M/W          | 40  | 15.8             | 192                          | 8.4 | 6.9 | ASCVD                       | 933                         | Disorganized schizophrenia                       | M/W          | 44  | 8.3              | 153                          | 8.1 | 5.9 | Myocarditis                         | No              | Yes                    | Yes                         | Yes                                    |
| 24                             | 1047  | M/W          | 43  | 13.8             | 135                          | 9.0 | 6.6 | ASCVD                       | 1209                        | Schizoaffective disorder                         | M/W          | 35  | 9.1              | 116                          | 8.7 | 6.5 | Suicide by diphenhydramine overdose | No              | Yes                    | No                          | No                                     |
| 25                             | 1086  | M/W          | 51  | 24.2             | 129                          | 8.1 | 6.8 | ASCVD                       | 10025                       | Disorganized schizophrenia; OAR                  | M/B          | 52  | 27.1             | 109                          | 7.8 | 6.7 | ASCVD                               | Yes             | No                     | No                          | No                                     |
| 26                             | 1092  | F/B          | 40  | 16.6             | 129                          | 8.0 | 6.8 | Mitral valve prolapse       | 1178                        | Schizoaffective disorder                         | F/B          | 37  | 18.9             | 120                          | 8.4 | 6.1 | Pulmonary embolism                  | Yes             | Yes                    | No                          | Yes                                    |
| 27                             | 10005 | M/W          | 42  | 23.5             | 117                          | 7.4 | 6.7 | Trauma                      | 1256                        | Undifferentiated schizophrenia                   | M/W          | 34  | 27.4             | 108                          | 7.9 | 6.4 | Suicide by hanging                  | No              | Yes                    | No                          | No                                     |
| 28                             | 1336  | M/W          | 65  | 18.4             | 93                           | 8.0 | 6.8 | Cardiac tamponade           | 1173                        | Disorganized schizophrenia; ADR                  | M/W          | 62  | 22.9             | 120                          | 7.7 | 6.4 | ASCVD                               | Yes             | Yes                    | No                          | No                                     |
| 29                             | 1122  | M/W          | 55  | 15.4             | 125                          | 7.9 | 6.7 | Cardiac tamponade           | 1105                        | Schizoaffective disorder                         | M/W          | 53  | 7.9              | 127                          | 8.9 | 6.2 | ASCVD                               | Yes             | Yes                    | No                          | No                                     |

| Unaffected Comparison Subjects |       |              |     |                  |                              |     |     |                         | Subjects with Schizophrenia |                                          |              |     |                  |                              |     |     |                                   |                 |                        |                             |                                           |
|--------------------------------|-------|--------------|-----|------------------|------------------------------|-----|-----|-------------------------|-----------------------------|------------------------------------------|--------------|-----|------------------|------------------------------|-----|-----|-----------------------------------|-----------------|------------------------|-----------------------------|-------------------------------------------|
| Pair                           | Case  | Sex/<br>Race | Age | PMI <sup>a</sup> | Storage<br>Time <sup>b</sup> | RIN | pH  | Cause of Death          | Case                        | DSM IV diagnosis                         | Sex/<br>Race | Age | PMI <sup>a</sup> | Storage<br>Time <sup>b</sup> | RIN | pH  | Cause of Death                    | Tobacco<br>ATOD | Anti-psychotic<br>ATOD | Anti-<br>depressant<br>ATOD | Benzodiazepine/<br>Anticonvulsant<br>ATOD |
| 30                             | 1284  | M/W          | 55  | 6.4              | 104                          | 8.7 | 6.8 | ASCVD                   | 1188                        | Undifferentiated schizophrenia; AAR; OAR | M/W          | 58  | 7.7              | 118                          | 8.4 | 6.2 | ASCVD                             | Yes             | Yes                    | No                          | No                                        |
| 31                             | 1191  | M/B          | 59  | 19.4             | 118                          | 8.4 | 6.2 | ASCVD                   | 1263                        | Undifferentiated schizophrenia; ADR      | M/W          | 62  | 22.7             | 107                          | 8.5 | 7.1 | Accidental asphyxiation           | Yes             | Yes                    | Yes                         | No                                        |
| 32                             | 970   | M/W          | 42  | 25.9             | 146                          | 7.2 | 6.4 | ASCVD                   | 1222                        | Undifferentiated schizophrenia; AAC      | M/W          | 32  | 30.8             | 113                          | 7.5 | 6.4 | Suicide by combined drug overdose | No              | Yes                    | Yes                         | No                                        |
| 33                             | 10003 | M/W          | 49  | 21.2             | 117                          | 8.4 | 6.5 | Trauma                  | 1088                        | Undifferentiated schizophrenia; ADC; OAC | M/W          | 49  | 21.5             | 129                          | 8.1 | 6.5 | Accidental combined drug overdose | Yes             | Yes                    | Yes                         | No                                        |
| 34                             | 1247  | F/W          | 58  | 22.7             | 110                          | 8.4 | 6.4 | ASCVD                   | 1240                        | Undifferentiated schizophrenia; ADR      | F/B          | 50  | 22.9             | 110                          | 7.7 | 6.3 | ASCVD                             | Yes             | Yes                    | No                          | No                                        |
| 35                             | 1324  | M/W          | 43  | 22.3             | 96                           | 7.3 | 7   | Aortic dissection       | 10020                       | Schizophrenia, paranoid type; AAC; OAC   | M/W          | 38  | 28.8             | 110                          | 7.4 | 6.6 | Suicide by salicylate overdose    | Yes             | Yes                    | Yes                         | Yes                                       |
| 36                             | 1099  | F/W          | 24  | 9.1              | 128                          | 8.6 | 6.5 | Cardiomyopathy          | 10023                       | Disorganized schizophrenia               | F/B          | 25  | 20.1             | 109                          | 7.4 | 6.7 | Suicide by drowning               | No              | Yes                    | No                          | Yes                                       |
| 37                             | 1307  | M/B          | 32  | 4.8              | 99                           | 7.6 | 6.7 | ASCVD                   | 10024                       | Paranoid schizophrenia                   | M/B          | 37  | 6.0              | 108                          | 7.5 | 6.1 | ASCVD                             | No              | No                     | No                          | No                                        |
| 38                             | 1391  | F/W          | 51  | 7.8              | 85                           | 7.1 | 6.6 | ASCVD                   | 1189                        | Schizoaffective disorder; AAR            | F/W          | 47  | 14.4             | 118                          | 8.3 | 6.4 | Suicide by combined drug overdose | Yes             | Yes                    | Yes                         | Yes                                       |
| 39                             | 1282  | F/W          | 39  | 24.5             | 104                          | 7.5 | 6.8 | ASCVD                   | 1211                        | Schizoaffective disorder                 | F/W          | 41  | 20.1             | 115                          | 7.8 | 6.3 | Sudden unexplained death          | Yes             | Yes                    | Yes                         | No                                        |
| 40                             | 1159  | M/W          | 51  | 16.7             | 121                          | 7.6 | 6.5 | ASCVD                   | 1296                        | Undifferentiated schizophrenia           | M/W          | 48  | 7.8              | 102                          | 7.3 | 6.5 | Pneumonia                         | Yes             | Yes                    | Yes                         | No                                        |
| 41                             | 1326  | M/W          | 58  | 16.4             | 95                           | 8.0 | 6.7 | ASCVD                   | 1314                        | Undifferentiated schizophrenia           | M/W          | 50  | 11.0             | 98                           | 7.2 | 6.2 | ASCVD                             | No              | Yes                    | Yes                         | No                                        |
| 42                             | 902   | M/W          | 60  | 23.6             | 161                          | 7.7 | 6.7 | ASCVD                   | 1361                        | Schizoaffective disorder; ODC            | M/W          | 63  | 23.2             | 91                           | 7.7 | 6.4 | Cardiomyopathy                    | Yes             | Yes                    | No                          | Yes                                       |
| 43                             | 1374  | M/W          | 43  | 21.7             | 89                           | 7.2 | 6.6 | ASCVD                   | 904                         | Schizoaffective disorder                 | M/W          | 33  | 28.0             | 160                          | 7.1 | 6.2 | Pneumonia                         | Yes             | Yes                    | No                          | Yes                                       |
| 44                             | 1555  | M/W          | 17  | 15.1             | 54                           | 7.9 | 6.9 | Trauma                  | 1649                        | Undifferentiated schizophrenia           | M/B          | 17  | 21.4             | 39                           | 8.1 | 6.9 | Suicide by hanging                | No              | Yes                    | Yes                         | No                                        |
| 45                             | 1268  | M/B          | 49  | 19.9             | 107                          | 7.9 | 7.1 | ASCVD                   | 1230                        | Undifferentiated schizophrenia           | M/W          | 50  | 16.9             | 112                          | 8.2 | 6.6 | Suicide by doxepin overdose       | Yes             | Yes                    | Yes                         | No                                        |
| 46                             | 1466  | F/B          | 64  | 20.0             | 70                           | 8.8 | 6.7 | Trauma                  | 1341                        | Schizoaffective disorder; ODC            | F/W          | 44  | 24.5             | 92                           | 8.8 | 6.6 | Trauma                            | No              | Yes                    | No                          | Yes                                       |
| 47                             | 1518  | M/W          | 50  | 20.7             | 60                           | 7.7 | 6.4 | ASCVD                   | 1367                        | Schizoaffective disorder; ADC; ODR       | M/W          | 47  | 28.9             | 90                           | 7.2 | 6.6 | Combined drug overdose            | No              | No                     | No                          | No                                        |
| 48                             | 1386  | M/W          | 46  | 21.2             | 85                           | 8.3 | 6.7 | ASCVD                   | 1420                        | Schizoaffective disorder; AAR; ODC; OAR  | M/W          | 47  | 23.4             | 79                           | 8.2 | 6.8 | Suicide by jump                   | Yes             | Yes                    | Yes                         | No                                        |
| 49                             | 1472  | M/W          | 61  | 23.8             | 74                           | 8.0 | 6.5 | Pulmonary embolism      | 1453                        | Paranoid schizophrenia; ADR              | M/W          | 62  | 11.1             | 77                           | 8.2 | 6.4 | Trauma                            | Yes             | Yes                    | No                          | Yes                                       |
| 50                             | 1026  | M/W          | 59  | 19.8             | 141                          | 7.4 | 6.3 | ASCVD                   | 1454                        | Paranoid schizophrenia; AAR; ODC         | M/W          | 59  | 24.1             | 76                           | 7.6 | 6.1 | Trauma                            | Yes             | Yes                    | Yes                         | No                                        |
| 51                             | 694   | M/W          | 38  | 20.7             | 199                          | 7.7 | 7.0 | Subarachnoid hemorrhage | 1455                        | Paranoid schizophrenia; AAR; OAC         | M/W          | 42  | 8.2              | 73                           | 7.7 | 6.4 | Peritonitis                       | Yes             | Yes                    | No                          | Yes                                       |
| 52                             | 1350  | M/W          | 21  | 24.2             | 92                           | 7.3 | 6.4 | Trauma                  | 1474                        | Schizoaffective disorder; ADR            | M/W          | 37  | 39.9             | 71                           | 7.0 | 6.7 | Suicide by hanging                | No              | No                     | No                          | No                                        |
| 53                             | 1792  | F/W          | 36  | 28.1             | 14                           | 7.5 | 6.5 | Pulmonary embolism      | 1506                        | Schizoaffective disorder; ADC            | F/W          | 47  | 14.1             | 65                           | 7.5 | 6.6 | Combined drug overdose            | Yes             | Yes                    | Yes                         | No                                        |
| 54                             | 1524  | M/W          | 66  | 9.4              | 59                           | 8.1 | 6.4 | Intestinal infarction   | 1542                        | Paranoid schizophrenia                   | M/W          | 65  | 17.4             | 56                           | 7.8 | 6.7 | Combined drug overdose            | Yes             | Yes                    | Yes                         | Yes                                       |
| 55                             | 1270  | F/W          | 73  | 19.7             | 106                          | 7.7 | 6.7 | Trauma                  | 1579                        | Schizoaffective disorder; ADR; ODC       | F/W          | 69  | 16.1             | 50                           | 7.7 | 6.7 | ASCVD                             | Yes             | Yes                    | No                          | Yes                                       |
| 56                             | 1372  | M/W          | 37  | 20.5             | 89                           | 9.0 | 6.6 | Asphyxiation            | 1581                        | Paranoid schizophrenia; ODC; OAC         | M/W          | 32  | 18.4             | 49                           | 9.0 | 6.8 | ASCVD                             | Yes             | Yes                    | Yes                         | No                                        |
| 57                             | 1543  | F/W          | 45  | 17.9             | 55                           | 7.4 | 6.8 | Subarachnoid hemorrhage | 10026                       | Undifferentiated schizophrenia           | F/W          | 46  | 23.8             | 108                          | 7.6 | 6.6 | Suicide by thermal injuries       | Yes             | Yes                    | Yes                         | No                                        |
| 58                             | 1583  | M/W          | 58  | 19.1             | 49                           | 8.2 | 6.8 | Trauma                  | 1686                        | Schizophrenia, paranoid type; AAR        | M/B          | 56  | 14.1             | 32                           | 8.3 | 6.2 | ASCVD                             | Yes             | Yes                    | Yes                         | Yes                                       |
| 59                             | 1554  | M/W          | 50  | 23.2             | 54                           | 7.6 | 6.5 | ASCVD                   | 1691                        | Schizophrenia, paranoid type; ADR; ODC   | M/W          | 51  | 31.9             | 30                           | 7.7 | 6.6 | Combined drug overdose            | Yes             | Yes                    | No                          | Yes                                       |

| Unaffected Comparison Subjects |      |              |      |                  |                              |      |     |                   | Subjects with Schizophrenia |                                                           |              |      |                  |                              |     |     |                |                  |                        |                             |                                           |
|--------------------------------|------|--------------|------|------------------|------------------------------|------|-----|-------------------|-----------------------------|-----------------------------------------------------------|--------------|------|------------------|------------------------------|-----|-----|----------------|------------------|------------------------|-----------------------------|-------------------------------------------|
| Pair                           | Case | Sex/<br>Race | Age  | PMI <sup>a</sup> | Storage<br>Time <sup>b</sup> | RIN  | pH  | Cause of Death    | Case                        | DSM IV diagnosis                                          | Sex/<br>Race | Age  | PMI <sup>a</sup> | Storage<br>Time <sup>b</sup> | RIN | pH  | Cause of Death | Tobacco<br>ATOD  | Anti-psychotic<br>ATOD | Anti-<br>depressant<br>ATOD | Benzodiazepine/<br>Anticonvulsant<br>ATOD |
| 60                             | 1635 | M/W          | 66   | 25.3             | 41                           | 8.2  | 6.8 | Cardiac tamponade | 1706                        | Schizoaffective disorder;<br>AAR; ODC; OAR                | M/B          | 60   | 28.1             | 27                           | 8.4 | 6.8 | Sepsis         | Yes              | Yes                    | No                          | No                                        |
| 61                             | 1384 | M/W          | 67   | 21.9             | 86                           | 7.0  | 6.6 | ASCVD             | 1712                        | Schizoaffective disorder;<br>ADR; ODC                     | M/W          | 63   | 15.1             | 24                           | 7.1 | 6.2 | ASCVD          | No               | Yes                    | Yes                         | Yes                                       |
| 62                             | 1558 | M/W          | 54   | 24.4             | 52                           | 7.7  | 6.9 | ASCVD             | 1734                        | Schizophrenia,<br>undifferentiated type; AAR;<br>ODC; OAR | M/W          | 54   | 28.6             | 21                           | 7.7 | 6.1 | Pneumonia      | Yes              | Yes                    | No                          | No                                        |
|                                |      | Mean         | 48.7 | 18.8             | 132.8                        | 8.18 | 6.7 |                   |                             |                                                           |              | 47.7 | 19.2             | 129.0                        | 8.1 | 6.6 |                | 41Y/13N/8U<br>nk | 54Y/8N                 | 27Y/35N                     | 24Y/38N                                   |
|                                |      | SD           | 13.8 | 5.5              | 56.8                         | 0.6  | 0.2 |                   |                             |                                                           |              | 12.7 | 8.5              | 61.3                         | 0.6 | 0.3 |                |                  |                        |                             |                                           |

<sup>a</sup>PMI, postmortem interval (hours); <sup>b</sup> Storage time (months) at -80C; Other abbreviations: ASCVD, arteriosclerotic cardiovascular disease; MCA, middle cerebral artery; ATOD, at time of death; ADC, alcohol dependence, current at time of death; ADR, alcohol dependence, in remission at time of death; AAC, alcohol abuse, current at time of death; AAR, alcohol abuse, in remission at time of death; ODC, other substance dependence, current at time of death; ODR, other substance dependence, in remission at time of death; OAC, other substance abuse, current at time of death; OAR, other substance abuse, in remission at time of death; U, unknown; M, male; F, female; W, white; B, black.

**Supplemental Table S2: Primer sets for quantitative PCR**

| Gene                                             | Species        | Accession #  | Amplicon Size (bp) | Position  | Forward Primer (F)<br>Reverse Primer (R)              |
|--------------------------------------------------|----------------|--------------|--------------------|-----------|-------------------------------------------------------|
| Arx                                              | Human          | NM_139058    | 51                 | 250-300   | (F) GCCCGAGTGCAAAAGTAAAT<br>(R) TCGATGCAGTAGGAGGAGAG  |
| cMaf                                             | Human          | NM_005360    | 86                 | 1800-1885 | (F) AAGTCGACCACCTCAAGCAG<br>(R) GCTGCTCACCAACTTCTCG   |
| Dlx1                                             | Human          | NM_178120    | 78                 | 216-293   | (F) GCCAGAAAAGTCTCAACAGCC<br>(R) GGAGACATTTGCTGGTTGGG |
| Dlx5                                             | Human          | NM_005221    | 55                 | 286-340   | (F) TATGCACCATCCGTCTCAGG<br>(R) ATCGGTAGCTGAAGACTCGG  |
| Dlx6                                             | Human          | NM_005222    | 93                 | 422-514   | (F) GAGGGGACGACACAGATCAA<br>(R) TCCGAGGCTTCCGAATCTTT  |
| FgfR1                                            | Human          | NM_023110    | 57                 | 1948-2004 | (F) GCAGGGGAGTATACGTGCTT<br>(R) TGCAGAGTGATGGGAGAGTC  |
| MafB                                             | Human          | NM_005461    | 56                 | 610-665   | (F) CGACCGAACAGAAGACACAC<br>(R) CTGGTAGTTGCTCGCCATC   |
| Nkx6.2                                           | Human          | NM_177400    | 92                 | 782-873   | (F) GAGGACGACGACGAATACAA<br>(R) AAGTTCGAGGGTTTGTGCTT  |
| PGC-1 $\alpha$                                   | Human          | NM_013261    | 107                | 1766-1872 | (F) ATTCTGTGTCACCACCCAAA<br>(R) GGAATATGGTGATCGGGAAC  |
| SATB1                                            | Human          | NM_002971    | 86                 | 1863-1918 | (F) GAAGGCTTGGGAGTACAGGT<br>(R) GCCCGAGTGTTTAAAGGCA   |
| ST8SIA4                                          | Human          | NM_005668    | 84                 | 343-426   | (F) AGGAAGAGGTGGACGATCTG<br>(R) CTGGTGCTCCTCAGTCTTG   |
| Sip1/Zeb2                                        | Human          | NM_014795    | 54                 | 1213-1266 | (F) AAGTACCGCCACGAGAAGAA<br>(R) GTAGCTACAGAGAGGGCAGG  |
| Beta actin                                       | Human          | NM_001101    | 101                | 1146-1246 | (F) GATGTGGATCAGCAAGCA<br>(R) AGAAAGGGTGTAACGCAACTA   |
| Cyclophilin                                      | Human          | NM_021130    | 126                | 159-284   | (F) GCAGACAAGGTCCCAAAG<br>(R) GAAGTCACCACCCTGACAAC    |
| Glyceraldehyde-3-phosphate dehydrogenase (GAPDH) | Human          | NM_002046    | 87                 | 556-642   | (F) TGCACCACCAACTGCTTAGC<br>(R) GGCATGGACTGTGGTCATGAG |
| FgfR1                                            | Macaca mulatta | NM_001266647 | 57                 | 1948-2004 | (F) GCAGGGGAGTATACGTGCTT<br>(R) TGCAGAGTGATGGGAGAGTC  |
| MafB                                             | Macaca mulatta | XM_001101624 | 56                 | 610-665   | (F) CGACCGAACAGAAGACACAC<br>(R) CTGGTAGTTGCTCGCCATC   |
| PGC-1 $\alpha$                                   | Macaca mulatta | XM_001105289 | 107                | 1766-1872 | (F) ATTCCGTGTCACCACCCAAA<br>(R) GGAATATGGTGATCGGGAAC  |
| Beta actin                                       | Macaca mulatta | NM_001033084 | 101                | 1087-1187 | (F) GATGTGGATCAGCAAGCA<br>(R) AGAAAGGGTGTAACGCAACTA   |
| Cyclophilin                                      | Macaca mulatta | NM_001032809 | 126                | 76-201    | (F) GCAGACAAGGTTCCCAAAG<br>(R) GAAGTCACCACCCTGACAC    |
| GAPDH                                            | Macaca mulatta | XM_001105471 | 93                 | 527-619   | (F) TGCACCACCAACTGCTTAGC<br>(R) AGTGATGGCGTGGACTGTG   |

## Supplemental Figure Legends

**Supplemental Figure S1. Correlations between MafB mRNA levels and mRNA levels for GAD67 and parvalbumin in the PFC of unaffected comparison subjects and schizophrenia subjects.** MafB mRNA levels are significantly correlated with mRNA levels for GAD67 (A) and parvalbumin (C) in unaffected comparison subjects (open circles) but not in schizophrenia subjects (B, D, respectively; dark gray circles).

**Supplemental Figure S2. Correlations between PGC-1 $\alpha$  mRNA levels and mRNA levels for GAD67 and parvalbumin in the PFC of unaffected comparison subjects and schizophrenia subjects.** PGC-1 $\alpha$  mRNA levels are nearly significantly correlated with GAD67 mRNA levels (A) and significantly correlated with parvalbumin mRNA levels (C) in unaffected comparison subjects (open circles) but not in schizophrenia subjects (B, D, respectively; dark gray circles).

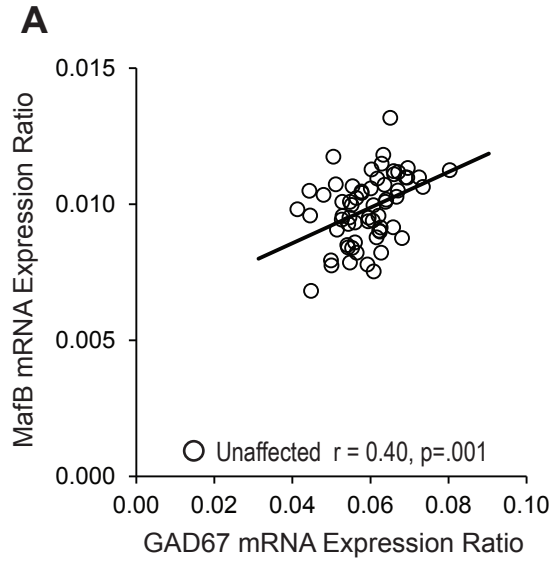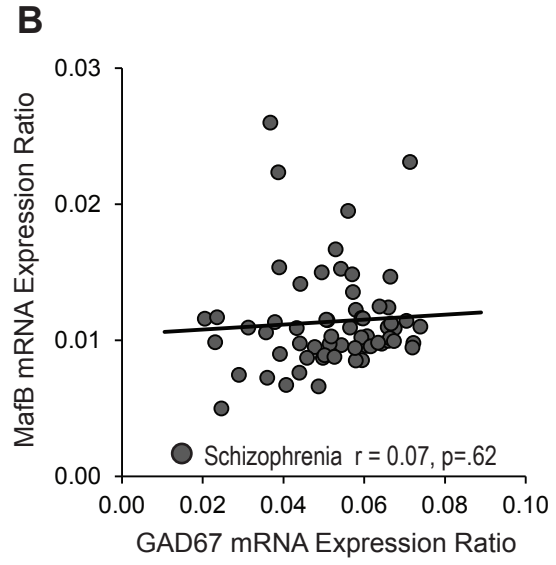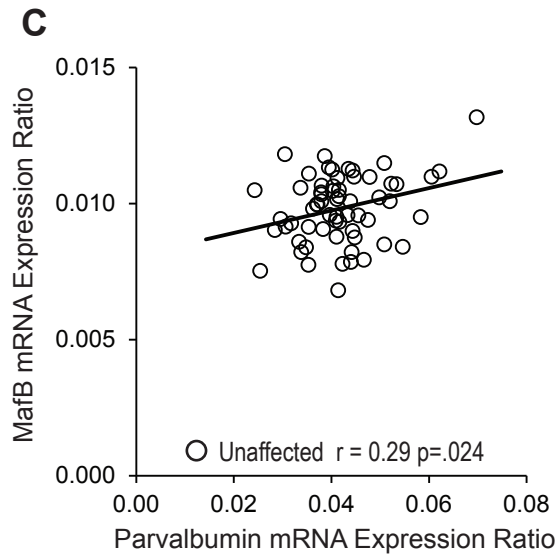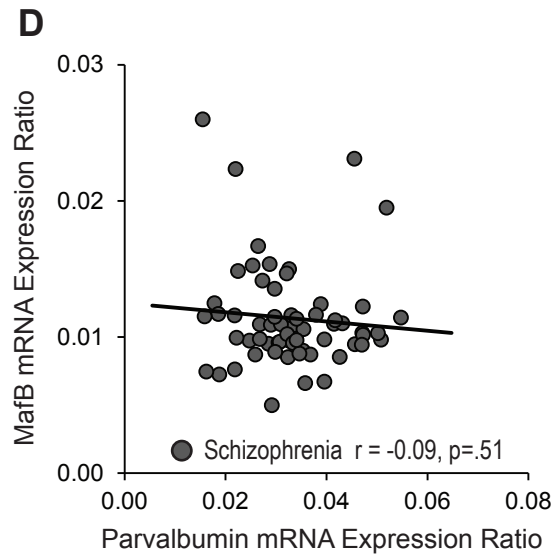

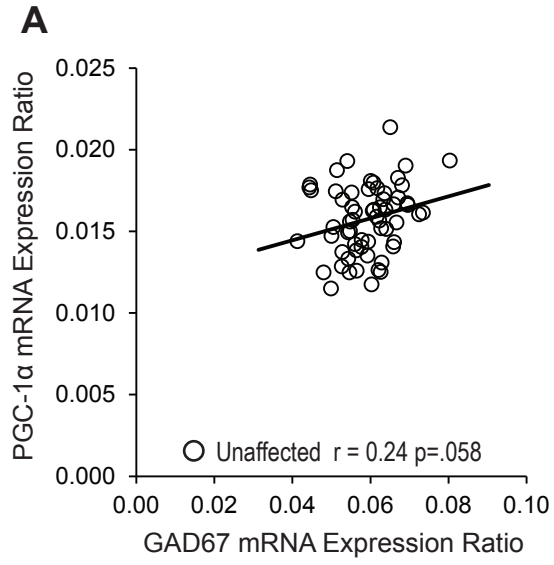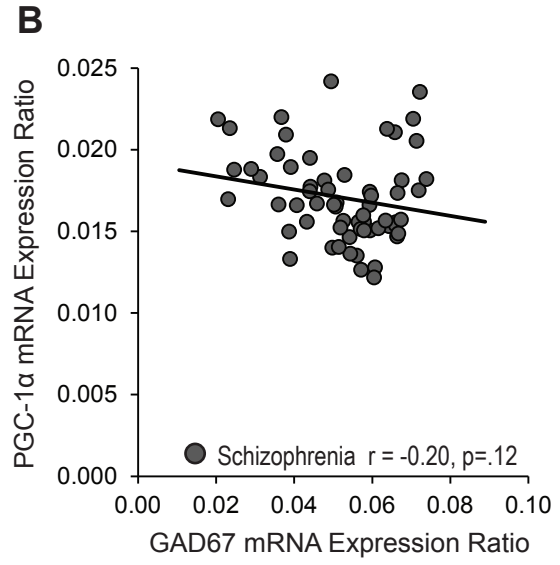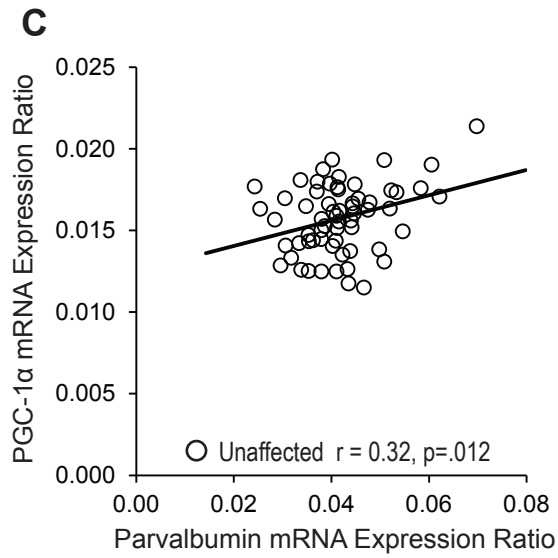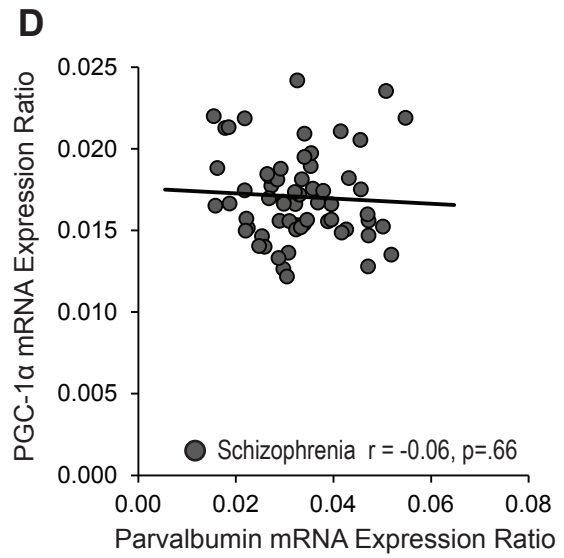

Supplement: NIHMS768304-supplement.pdf [file NIHMS768304-supplement.pdf]
